# Supplementary material for: Autonomous wave gliders as a tool to characterize delphinid habitats along the Florida Atlantic coast
Source: PeerJ. 2025 Apr 4;13:e19204. doi: 10.7717/peerj.19204 (PMC11974517; doi:10.7717/peerj.19204)
Supplement: Supplemental Information 2 [file peerj-13-19204-s002.xlsx]

## Sheet: GAM10k
Date	ID	Time	Latitude	Longitude	Presence	Clicks	Whistles	Temp	Sal	Gdepth	SPL	SPL3	Fish	Anthropogenic	CurrentS	CurrentH	Distance	Chla	Satchla	SST	Matched_UO	Matched_VO	SatSpeed	SatHeading	SatSal	Depth
2019-03-08	702	19:25:00	27.4694	-80.1154	0	0	0	19.874	33.3682	10.4947	159.091	127.155	0.818182	0	0.3004	136.608	3.65979	306.911	1.44514	21.189	-0.0750755	0.515763	0.521198	98.2819	36.3994	-18.2761
2019-03-08	747	21:55:00	27.4599	-80.0799	0.102041	0.0204082	0.0816327	20.0184	33.4508	10.7949	159.144	125.458	0.122449	0	0.405385	154.338	9.06037	301.361	1.09723	21.789	-0.0750755	0.515763	0.521198	98.2819	36.3994	-28.6541
2019-03-09	701	23:55:00	27.5349	-80.1157	0	0	0	19.812	33.18	9.441	159.293	129.279	0	0	0.87	293.63	12.6442	161.794	1.20678	21.054	-0.0750755	0.515763	0.521198	98.2819	36.3994	-19.9633
2019-03-09	703	06:52:30	27.4233	-80.14	0.0333333	0.00833333	0.0333333	20.8405	34.1307	10.5871	159.363	132.471	0.0666667	0.05	0.422903	186.062	12.4399	266.505	1.24417	20.982	-0.0616474	0.298471	0.304771	101.67	36.4101	-15.7654
2019-03-09	746	22:32:30	27.5218	-80.0802	0.125	0	0.125	20.1442	33.4153	9.646	159.216	132.018	0.125	0	1.39125	320.185	8.41385	204.071	0.961215	21.544	-0.0750755	0.515763	0.521198	98.2819	36.3994	-31.5718
2019-03-09	747	11:25:00	27.4467	-80.0699	0.137255	0	0.137255	20.4286	33.7227	10.2085	159.304	133.721	0.45098	0	1.17917	324.952	4.63985	247.101	0.790488	21.896	-0.0799585	0.518815	0.52494	98.7614	36.3994	-28.6541
2019-03-09	748	15:22:30	27.405	-80.0699	0.0119048	0	0.0119048	21.256	34.4817	9.82183	159.377	131.538	0.0833333	0.0595238	0.391429	222.458	40.5323	188.361	0.725236	22.14	-0.0799585	0.518815	0.52494	98.7614	36.3994	-26.1681
2019-03-10	655	23:05:00	27.7517	-80.197	0	0	0	19.4483	33.3019	11.9967	159.097	128.651	0.190476	0	0.651667	274.032	22.3255	293.854	1.27687	20.49	-0.0579852	0.277718	0.283707	101.793	36.404	-15.1905
2019-03-10	658	04:35:00	27.5511	-80.2084	0	0	0	21.015	33.9715	9.22803	159.493	135.548	0.230769	0	0.890909	195.035	23.2134	293.037	1.26876	20.549	-0.0286874	0.173345	0.175703	99.3969	36.4284	-14.5042
2019-03-10	699	19:52:30	27.7494	-80.1347	0.0535714	0.0357143	0.0357143	19.6104	33.2559	10.7601	159.027	132.458	0.339286	0	0.933571	304.472	11.919	224.912	0.895461	20.589	-0.0579852	0.277718	0.283707	101.793	36.404	-23.4718
2019-03-10	700	13:04:51	27.6426	-80.1243	0	0	0	21.0884	34.1966	9.6086	159.381	132.037	0.117647	0.0588235	0.911667	150.427	8.8071	211.025	0.951072	20.928	-0.0451674	0.499283	0.501322	95.1692	36.3994	-22.2119
2019-03-10	701	04:43:13	27.567	-80.151	0.0178571	0.0178571	0	20.7453	33.8955	10.1573	159.312	132.131	0.0535714	0	0.965	149.222	14.5504	251.791	0.996791	20.907	-0.037843	0.266732	0.269403	98.075	36.4071	-19.9633
2019-03-10	744	16:52:30	27.6903	-80.1014	0	0	0	20.5618	33.59	10.4436	159.028	130.032	0	0	1.095	190.25	6.33322	206.543	0.843935	20.902	-0.0451674	0.499283	0.501322	95.1692	36.3994	-39.7163
2019-03-10	745	10:42:30	27.634	-80.0915	0	0	0	21.3295	34.4045	9.5021	159.667	137.21	0.05	0	1.092	88.06	33.8175	192.763	0.704892	21.222	-0.0451674	0.499283	0.501322	95.1692	36.3994	-36.0197
2019-03-11	566	16:56:14	27.8396	-80.3447	0.0176991	0	0.0176991	19.2167	32.9396	15.3296	160.357	136.711	0.0530973	0.0265487	0.282414	217.687	5.83224	332.201	1.41362	20.25	-0.0488296	0.117801	0.127521	112.514	36.4406	-14.2949
2019-03-11	567	08:12:30	27.7876	-80.3375	0.05	0	0.05	19.3158	32.9303	14.1348	159.16	128.859	0	0.25	0.324	321.04	5.49983	324.595	1.50938	20.335	-0.0573748	0.14832	0.15903	111.148	36.4483	-7.81232
2019-03-11	610	16:52:30	27.8361	-80.3268	0.0357143	0.0357143	0.0178571	19.364	32.8918	14.8862	160.77	136.986	0.0178571	0.196429	0.31	239.467	10.101	330.997	1.41362	20.304	-0.0488296	0.117801	0.127521	112.514	36.4406	-13.4429
2019-03-11	611	04:12:30	27.7489	-80.2981	0.0535714	0.0535714	0.0178571	19.3032	33.0464	13.8055	159.084	128.505	0.160714	0.0892857	0.505714	296.617	6.01204	310.614	1.50832	20.666	-0.0573748	0.14832	0.15903	111.148	36.4483	-14.1803
2019-03-11	655	00:55:00	27.747	-80.2371	0	0	0	19.4143	33.2009	12.0971	159.067	129.836	0.478261	0.0869565	0.712	279.078	21.5685	308.231	1.27312	20.969	-0.04944	0.186163	0.192616	104.873	36.4223	-15.1905
2019-03-12	565	06:42:30	27.9089	-80.358	0.0648148	0	0.0648148	19.3083	33.5747	13.3781	160.374	134.656	0.0185185	0.101852	0.167778	212.281	3.40848	310.25	1.07336	20.973	-0.0402844	0.125736	0.132032	107.765	36.4345	-14.236
2019-03-12	566	01:05:00	27.8782	-80.3564	0	0	0	19.0841	33.287	15.7651	162.463	143.097	0	0	0.393333	306.738	6.17192	338.234	1.18043	20.981	-0.0402844	0.125736	0.132032	107.765	36.4345	-14.2949
2019-03-12	609	16:02:30	27.8758	-80.2937	0.00862069	0.00862069	0	20.4985	33.8376	12.6131	159.429	133.751	0.275862	0.189655	0.41	116.627	6.42379	253.85	1.0079	21.541	-0.0402844	0.125736	0.132032	107.765	36.4345	-15.3437
2019-03-12	653	22:25:00	27.9019	-80.2354	0.027027	0	0.027027	21.0031	33.6886	10.0692	159.349	133.976	0.0810811	0	0.13	167.939	31.8432	257.272	0.775483	21.547	-0.0653096	0.182501	0.193835	109.69	36.4132	-22.2528
2019-03-13	475	23:25:00	28.0545	-80.5098	0.307692	0.153846	0.153846	20.2035	32.8415	9.77031	159.414	136.163	0	0.0769231	0.61	328.933	3.63535	133.618	1.80639	20.318	-0.0689718	0.093997	0.116587	126.27	36.433	-11.7859
2019-03-13	476	21:42:30	28.025	-80.4938	0.0357143	0.0357143	0	20.0334	32.6693	10.1498	159.914	140.581	0	0.75	0.674286	321.393	7.67332	117.146	2.08669	20.521	-0.06592	0.0866726	0.108893	127.255	36.4391	-3.48876
2019-03-13	520	18:22:30	27.9652	-80.4547	0.0576923	0.0576923	0	19.8103	32.4485	9.8554	159.56	137.658	0	0.442308	0.954615	298.487	7.70506	127.878	1.88086	20.68	-0.0604266	0.110477	0.125923	118.677	36.4391	-14.8423
2019-03-13	565	15:02:30	27.9513	-80.3778	0.142857	0.0357143	0.142857	19.8244	32.3925	9.33018	159.571	133.273	0	0	1.085	261.44	8.24123	161.114	1.1935	20.773	-0.0347911	0.102542	0.108284	108.741	36.4452	-14.236
2019-03-13	608	12:10:00	27.9596	-80.2944	0.097561	0	0.097561	19.976	32.3688	8.928	160.17	133.517	0.0243902	0	1.05	258.424	8.72828	144.248	0.996127	21.087	-0.0671407	0.144658	0.15948	114.898	36.4238	-20.0873
2019-03-13	652	08:42:30	27.9684	-80.2061	0	0	0	20.1758	32.9283	8.82283	160.636	133.25	0	0	0.803333	249.683	3.50178	117.43	0.791494	21.319	-0.061037	0.299081	0.305246	101.535	36.401	-25.4507
2019-03-13	653	03:55:12	27.9372	-80.2114	0.0135135	0.0135135	0	20.7275	33.6991	9.189	159.528	134.176	0.337838	0.0135135	0.302105	126.699	4.72849	261.82	0.793504	21.415	-0.0653096	0.182501	0.193835	109.69	36.4132	-22.2528
2019-03-13	696	06:32:30	27.9656	-80.1756	0	0	0	20.5718	33.1478	8.9236	160.242	136.36	0.45	0.05	0.481818	114.971	34.6149	98.1934	0.668007	21.683	-0.061037	0.299081	0.305246	101.535	36.401	-34.5706
2019-03-14	475	01:05:00	28.0742	-80.5061	0.444444	0.407407	0.296296	20.0954	32.727	9.75148	159.798	136.406	0.0740741	0.222222	0.626667	161.507	5.00726	111.659	2.74062	20.238	-0.0689718	0.093997	0.116587	126.27	36.433	-11.7859
2019-03-14	519	03:22:30	28.0824	-80.4559	0.285714	0.214286	0.178571	20.2332	32.6968	9.62321	159.684	133.706	0.214286	0	0.745714	79.0471	7.58668	112.679	2.26208	20.379	-0.0726341	0.109867	0.131706	123.469	36.4269	-17.7831
2019-03-14	563	06:22:30	28.0925	-80.3794	0.159091	0.0454545	0.113636	19.8688	33.3775	9.56384	159.767	135.108	0.409091	0	0.834375	73.8756	17.8478	149.559	1.62562	20.474	-0.0726341	0.109867	0.131706	123.469	36.4269	-21.7175
2019-03-14	605	22:25:00	28.2337	-80.2928	0.405405	0.378378	0.135135	20.0056	32.8019	10.179	159.315	134.318	0	0	0.589231	276.538	14.4742	155.664	1.55046	19.998	-0.0323496	0.182501	0.185346	100.052	36.4116	-21.7859
2019-03-14	606	09:37:30	28.1036	-80.2958	0	0	0	20.7234	34.3529	9.17491	160.189	133.5	0	0	0.919333	74.1803	15.3133	162.069	1.4446	20.376	-0.0885037	0.158086	0.181174	119.242	36.4147	-23.1831
2019-03-14	649	19:10:00	28.2277	-80.2282	0.317073	0.219512	0.170732	19.7308	32.5922	10.1527	160.236	135.629	0.292683	0.219512	0.8875	317.204	7.56807	164.425	1.28769	20.381	-0.0408948	0.217292	0.221107	100.659	36.404	-31.3014
2019-03-14	650	15:40:00	28.1627	-80.2052	0.0465116	0.0232558	0.0465116	19.3077	32.5019	9.42756	159.931	132.185	0	0	0.967619	334.754	5.94331	161.858	1.20808	20.84	-0.0537126	0.289926	0.294859	100.496	36.4025	-28.6817
2019-03-14	651	12:27:30	28.1128	-80.2267	0	0	0	18.8755	32.7574	9.51632	159.61	131.238	0	0	0.6612	82.5028	33.7701	161.989	1.21083	20.785	-0.0909452	0.204474	0.223787	113.978	36.404	-27.5859
2019-03-15	472	13:02:30	28.3039	-80.4946	0.285714	0.142857	0.178571	18.9646	32.8343	11.9238	158.981	136.575	0	0.142857	0.625714	205.221	6.29216	489.086	6.07053	20.354	0.06592	0.157476	0.170716	67.2856	36.4391	-13.1915
2019-03-15	473	09:12:30	28.2498	-80.5135	0.28125	0.15625	0.171875	19.2231	32.4381	11.5497	158.71	135.221	0	0	0.625	276.962	10.9159	423.027	5.5141	20.258	-0.0238044	0.138554	0.140584	99.7486	36.4315	-15.8789
2019-03-15	515	16:22:30	28.3266	-80.444	0.392857	0.321429	0.0714286	19.2836	32.7757	13.1843	159.077	134.534	0	0.107143	0.441429	66.5514	2.99756	467.832	5.8915	20.144	0.0469985	0.185553	0.191412	75.7865	36.4284	-13.4901
2019-03-15	516	14:42:30	28.3224	-80.4742	0.416667	0.333333	0.166667	19.1565	32.7367	12.3572	158.855	133.624	0	0	0.42	65.8967	9.98459	524.372	6.36775	20.222	0.06592	0.157476	0.170716	67.2856	36.4391	-16.8676
2019-03-15	517	05:12:30	28.2345	-80.4532	0.09375	0.0625	0.0625	19.0763	32.4797	11.4785	158.379	134.642	0	0	0.798889	275.066	13.2317	319.851	4.64502	20.495	-0.0256355	0.14893	0.151121	99.7667	36.4223	-18.4592
2019-03-15	560	19:52:30	28.3351	-80.3811	0.25	0.196429	0.0892857	19.5209	32.515	12.5633	158.901	134.405	0.339286	0.0892857	0.504286	63.01	11.2552	194.897	3.59249	20.252	0.0469985	0.185553	0.191412	75.7865	36.4284	-17.9859
2019-03-15	561	02:02:30	28.2342	-80.3731	0.227273	0.113636	0.181818	19.2699	32.6593	10.9986	158.634	134.608	0.0454545	0.0909091	0.794615	278.658	13.2472	109.175	2.49031	20.713	-0.0323496	0.182501	0.185346	100.052	36.4116	-19.4915
2019-03-15	603	23:05:00	28.3435	-80.3194	0	0	0	19.3616	32.5276	11.8397	158.485	133.849	0	0	0.6	65.6667	12.2118	108.893	2.58444	20.193	0.0061037	0.206305	0.206395	88.3054	36.4147	-24.2366
2019-03-16	558	21:35:22	28.4725	-80.3752	0.243902	0.146341	0.170732	19.8334	32.6932	11.7245	159.475	134.94	0.219512	0	0.795	239.992	8.03905	299.25	4.47149	20.111	-0.0640889	0.252083	0.260102	104.265	36.436	-19.5521
2019-03-16	602	17:05:00	28.4671	-80.2931	0.140351	0	0.140351	19.5368	32.9893	9.84458	159.487	134.314	0.0175439	0.0175439	0.296774	252.399	13.2073	117.403	2.86024	20.266	-0.0683615	0.268563	0.277127	104.281	36.4162	-26.5437
2019-03-16	603	01:15:00	28.3492	-80.2773	0	0	0	18.7489	33.2268	12.1495	159.257	135.48	0.451613	0.16129	0.48	66.7371	13.8186	110.37	2.39415	20.607	-0.0311289	0.228278	0.230391	97.7652	36.4055	-24.2366
2019-03-16	646	11:47:30	28.4723	-80.2583	0.0428571	0	0.0428571	18.9669	33.2533	13.3622	159.022	133.55	0	0.571429	0.4925	134.806	7.9119	108.938	2.5261	20.493	-0.0744652	0.310068	0.318884	103.504	36.4055	-37.507
2019-03-16	647	06:57:30	28.4043	-80.2346	0.23913	0	0.23913	19.4895	34.2102	16.9389	159.107	134.952	0.434783	0.326087	0.911333	334.021	5.46146	109.226	2.63076	21.045	-0.0451674	0.266732	0.270529	99.6111	36.4055	-35.4197
2019-03-16	648	03:47:30	28.3552	-80.2362	0.433333	0.166667	0.333333	18.741	32.793	11.9529	159.205	135.391	0.7	0	0.386667	87.2444	19.8657	112.679	2.26209	21.073	-0.0311289	0.228278	0.230391	97.7652	36.4055	-34.1099
2019-03-17	558	02:19:25	28.5007	-80.3541	0.230769	0.230769	0.0769231	19.9127	32.5765	10.0798	159.207	134.29	0.269231	0	0.374545	86.9827	5.49282	223.09	3.82997	20.136	-0.0683615	0.268563	0.277127	104.281	36.4162	-19.5521
2019-03-17	601	06:10:00	28.5254	-80.3054	0.107692	0.0461538	0.0615385	21.7462	34.9335	11.6075	159.528	134.846	0.492308	0	0.387027	75.1235	9.60049	125.612	2.97089	20.345	-0.0683615	0.268563	0.277127	104.281	36.4162	-28.5311
2019-03-17	645	12:30:00	28.5689	-80.2205	0	0	0	24.6535	36.3562	10.72	159.02	130.081	0	0.103448	0.378696	117.856	7.98825	116.614	2.10255	21.465	-0.06592	0.360118	0.366102	100.373	36.4071	-38.8051
2019-03-17	688	18:37:30	28.6051	-80.1498	0	0	0	25.3166	36.4488	9.14832	160.143	133.652	0	0	0.458	66.0167	8.11751	138.91	0.950338	22.713	-0.0769066	0.451064	0.457573	99.6759	36.404	-52.8794
2019-03-17	732	22:32:30	28.6419	-80.078	0	0	0	25.1599	36.4365	8.4025	164.064	139.306	0	0	0.901111	53.8322	32.7363	29.2074	0.195812	23.988	-0.137333	0.800195	0.811895	99.7385	36.401	-79.209
2019-03-18	511	23:02:30	28.6777	-80.4111	0.0909091	0	0.0909091	18.0674	32.7205	9.05236	161.07	134.558	0	0	0.292308	208.157	3.76555	122.349	2.93089	20.402	-0.0952177	0.28077	0.296477	108.733	36.4345	-16.2147
2019-03-18	556	20:12:30	28.6725	-80.3729	0	0	0	18.1088	32.7372	9.72967	160.479	135.432	0.630435	0	0.655405	252.94	6.86581	116.36	2.84289	20.733	-0.0921659	0.336924	0.349303	105.299	36.4162	-18.7853
2019-03-18	599	14:32:30	28.6527	-80.3063	0.0555556	0.0555556	0.0111111	18.3774	33.233	9.57921	160.951	133.899	0.0111111	0	0.412759	239.685	7.56625	163.513	3.32731	21.289	-0.0921659	0.336924	0.349303	105.299	36.4162	-29.596
2019-03-18	644	09:17:30	28.6691	-80.231	0.138889	0.138889	0	18.6074	32.8697	9.04175	161.347	134.161	0	0	1.10778	216.082	8.67367	122.303	1.96969	22.24	-0.0634785	0.392468	0.397568	99.1876	36.4071	-40.1864
2019-03-18	687	06:27:30	28.6938	-80.1467	0.03125	0.03125	0	21.4887	34.4706	9.34794	160.066	135.995	0.53125	0.5	1.45875	237.84	8.75963	85.1466	0.588424	23.289	-0.0622578	0.509049	0.512842	96.9728	36.404	-56.3654
2019-03-18	731	03:17:30	28.7266	-80.065	0	0	0	24.6053	36.3409	9.3213	161.647	135.045	0.204545	0	1.65727	289.375	7.5059	30.3516	0.205761	24.479	-0.110477	0.894192	0.900991	97.0432	36.3994	-91.4141
2019-03-18	732	00:12:30	28.6627	-80.0401	0	0	0	25.153	36.4583	9.17533	160.582	131.347	0	0	1.28	31.58	2.48441	28.9388	0.193468	24.578	-0.23072	1.16398	1.18662	101.212	36.3903	-79.209
2019-03-18	775	00:57:30	28.6823	-80.0279	0	0	0	25.2181	36.4642	9.08183	161.024	133.154	0.25	0	1.93	10.9833	69.6622	26.2441	0.169816	24.723	-0.23072	1.16398	1.18662	101.212	36.3903	-180.161
2019-03-19	378	20:10:00	28.782	-80.6961	0.278481	0.113924	0.253165	17.7361	32.033	10.0291	162.613	138.331	1	0	0.521731	285.256	8.8876	207.572	3.69926	20.676	-0.0830103	0.0824	0.116964	135.211	36.4528	-5.03944
2019-03-19	422	14:20:00	28.7539	-80.6107	0.147541	0.0327869	0.131148	17.9871	32.0251	9.65575	161.168	134.786	0.0819672	0	0.571	267.478	8.53681	118.953	2.88415	21.187	-0.0897244	0.11536	0.146145	127.875	36.4483	-15.0423
2019-03-19	467	09:47:30	28.7156	-80.5348	0.125	0.104167	0.0416667	17.9345	32.1131	9.18965	161.271	135.484	0	0	0.72	296.646	9.78001	109.325	2.63904	21.646	-0.109256	0.190435	0.219551	119.844	36.4406	-16.3305
2019-03-19	511	03:52:30	28.6825	-80.4419	0.106383	0.106383	0	17.9259	32.4996	9.31524	161.274	133.631	0.0425532	0	0.45381	199.595	46.3619	111.871	2.30537	22.155	-0.0952177	0.28077	0.296477	108.733	36.4345	-16.5
2019-03-20	288	22:45:00	28.946	-80.8107	0.310345	0.275862	0.172414	17.4673	32.4641	11.3128	161.737	138.959	1	0	0.420952	275.583	5.20756	164.786	3.33819	19.158	-0.0885037	0.112308	0.14299	128.24	36.4452	-16.2147
2019-03-20	332	15:20:00	28.9092	-80.7776	0.248322	0.234899	0.0604027	17.462	32.6277	9.77047	162.076	138.016	0.577181	0	0.30073	220.739	7.9116	165.439	3.34375	19.338	-0.0952177	0.120243	0.153378	128.375	36.4422	-4.75367
2019-03-21	288	11:57:30	28.9517	-80.8161	0.135417	0.0902778	0.0694444	17.3844	32.3413	14.6292	160.245	134.741	0.638889	0	0.53	195.044	0.0202394	206.213	3.68781	18.18	-0.0885037	0.112308	0.14299	128.24	36.4452	-15.6091
2019-03-22	288	11:57:30	28.9518	-80.8159	0.173611	0.142361	0.0694444	17.468	32.4221	14.3702	159.783	134.127	0.729167	0.0104167	0.494309	195.095	0.133547	216.75	3.77657	17.787	-0.0885037	0.112308	0.14299	128.24	36.4452	-5.03944
2019-03-23	288	11:57:30	28.9529	-80.8155	0.208333	0.118056	0.128472	17.564	32.853	12.6606	159.544	133.591	0.510417	0.03125	0.485363	231.012	0.0878688	240.544	3.97699	18.011	-0.0885037	0.112308	0.14299	128.24	36.4452	-4.75367
2019-03-24	288	11:57:30	28.9523	-80.8161	0.329861	0.225694	0.208333	17.5716	32.8813	14.9018	158.932	132.95	0.361111	0.0763889	0.482366	237.553	0.256825	194.478	3.58896	18.147	-0.0885037	0.112308	0.14299	128.24	36.4452	-4.75367
2019-03-25	288	09:42:30	28.9546	-80.8165	0.282051	0.183761	0.17094	18.1779	33.0136	16.3285	158.886	132.964	0.0555556	0	0.611957	307.177	4.59505	200.197	3.49857	18.156	-0.0885037	0.112308	0.14299	128.24	36.4452	-4.75367
2019-03-25	331	21:42:30	28.9937	-80.8013	0	0	0	19.3319	33.6433	14.1344	158.991	133.453	0.0555556	0	0.58	328.541	4.27186	188.375	3.31386	18.24	-0.0646992	0.100101	0.11919	122.876	36.4406	-18.5944
2019-03-26	287	03:57:30	29.0314	-80.7925	0.5	0.25	0.5	19.7667	33.7625	12.1152	159.305	131.999	0	0	0.98	344.54	6.1676	168.3	3.23118	18.764	-0.0646992	0.100101	0.11919	122.876	36.4406	-16.208
2019-03-26	330	07:48:13	29.0782	-80.7585	0.091954	0.0229885	0.0804598	20.9199	34.2364	10.2227	159.854	132.152	0.045977	0	0.54931	131.859	8.7862	156.704	3.23395	19.098	-0.0531022	0.124516	0.135366	113.097	36.436	-18.3211
2019-03-26	331	01:52:30	29.0074	-80.7987	0.195652	0.0217391	0.173913	19.4041	33.6554	11.7345	159.179	131.432	0.195652	0	0.845	329.555	9.72431	177.02	3.14505	18.611	-0.0646992	0.100101	0.11919	122.876	36.4406	-18.5944
2019-03-26	375	14:37:30	29.0267	-80.7011	0.0263158	0	0.0263158	23.7375	35.4204	10.8967	159.545	131.17	0	0.0263158	0.352174	181.808	8.03112	111.418	2.9698	19.316	-0.0616474	0.151372	0.163444	112.159	36.4376	-18.4631
2019-03-26	376	20:17:30	28.9583	-80.6746	0.05	0	0.05	23.7625	35.5732	11.8587	159.246	136.703	0.15	0.45	0.532667	157.043	4.58355	57.9089	2.83215	19.297	-0.09888	0.145268	0.175727	124.242	36.4406	-17.6012
2019-03-26	420	23:22:30	28.9388	-80.6331	0.0714286	0	0.0714286	23.7984	35.5186	13.4268	159.303	131.467	0.142857	0	0.3825	97.5025	3.83845	48.8327	2.68883	19.462	-0.09888	0.145268	0.175727	124.242	36.4406	-19.6686
2019-03-27	420	02:22:30	28.9354	-80.5939	0	0	0	23.1883	35.0812	11.4351	159.243	132.15	0.241379	0	0.114286	125.405	5.16094	47.5819	2.29449	20.124	-0.102542	0.162358	0.192029	122.276	36.4345	-19.6686
2019-03-27	464	06:37:30	28.9308	-80.5411	0	0	0	23.3935	35.3761	9.18859	161.182	136.381	0.204545	0	0.436364	90.43	8.58971	57.0824	2.09662	20.378	-0.103763	0.190435	0.21687	118.585	36.4269	-19.3059
2019-03-27	508	09:57:30	28.923	-80.4533	0	0	0	24.6154	35.9169	8.91106	161.488	135.675	0	0	1.25222	98.3156	6.94432	71.3742	1.76984	20.608	-0.0970489	0.23011	0.249738	112.868	36.4177	-21.791
2019-03-27	552	12:07:30	28.9167	-80.3823	0	0	0	24.9446	35.8888	9.04637	162.048	135.31	0	0	1.3025	102.87	2.42932	40.3113	1.42296	20.599	-0.0970489	0.23011	0.249738	112.868	36.4177	-27.8882
2019-03-27	553	12:57:30	28.9146	-80.3575	0	0	0	24.9093	35.9725	9.4805	162.423	134.111	0	0	1.12	106.02	5.56006	34.0803	1.26028	20.678	-0.0781274	0.261849	0.273256	106.613	36.4086	-26.2175
2019-03-27	596	15:57:30	28.9112	-80.3005	0.0147059	0.0147059	0	25.0663	35.9554	9.09884	161.107	134.693	0	0	1.03765	121.87	9.73267	23.1899	0.767139	21.328	-0.0781274	0.261849	0.273256	106.613	36.4086	-36.5763
2019-03-27	640	20:27:30	28.9157	-80.2006	0	0	0	24.7587	35.8038	9.21888	161.125	137.963	0	0	1.04	97.09	2.60392	17.8666	0.424239	23.204	-0.00854518	0.507828	0.5079	90.964	36.4025	-48.6
2019-03-27	641	19:27:30	28.914	-80.2273	0	0	0	24.9907	35.8269	9.15081	161.338	136.73	0	0	1.0675	97.385	7.25534	16.313	0.482608	22.627	-0.0347911	0.326548	0.328396	96.0815	36.4055	-46.6761
2019-03-27	684	22:22:30	28.9186	-80.1529	0	0	0	24.6961	34.6237	9.24184	161.29	136.107	0	0	0.942	97.933	28.0771	18.1719	0.298041	24.13	-0.00854518	0.507828	0.5079	90.964	36.4025	-68.8446
2019-03-28	507	23:42:30	29.0135	-80.4203	0	0	0	19.061	32.6267	8.85317	162.23	138.9	0	0	0.625	258.655	4.16191	127.462	1.88677	22.308	-0.0738548	0.234993	0.246325	107.447	36.4147	-23.161
2019-03-28	551	21:27:30	29.013	-80.3776	0	0	0	19.9424	33.1235	8.90602	161.21	143.668	0.145833	0.5	0.6925	255.586	7.22483	68.7524	1.61157	22.542	-0.0738548	0.234993	0.246325	107.447	36.4147	-29.8527
2019-03-28	595	18:07:30	29.0154	-80.3033	0	0	0	21.8248	34.1519	8.73394	163.387	145.328	0.0625	0.3125	1.09125	249.71	7.99014	61.8553	0.934198	23.095	-0.0750755	0.269173	0.279447	105.584	36.4071	-38.762
2019-03-28	639	15:17:31	29.0335	-80.2238	0.0277778	0	0.0277778	22.8497	34.5514	8.8735	162.473	139.641	0.0555556	0	1.36333	239.032	9.01147	21.4861	0.568779	23.904	-0.0646992	0.318003	0.324518	101.5	36.4055	-51.8305
2019-03-28	682	12:17:30	29.0616	-80.1368	0	0	0	23.5534	35.1625	8.71336	162.766	136.451	0	0	1.39778	242.881	15.8616	18.5538	0.272694	24.809	-0.125126	0.573138	0.586637	102.315	36.401	-84.613
2019-03-28	684	00:12:30	28.9214	-80.1068	0	0	0	24.6817	35.7583	8.8165	163.136	136.305	0	0	1.27	91.35	18.1532	18.3035	0.319146	24.85	-0.0439467	0.911283	0.912342	92.761	36.3964	-68.8446
2019-03-28	726	09:57:32	29.0805	-80.0648	0.05	0.05	0	24.9666	35.8165	8.6634	162.96	137.622	0	0	1.234	290.554	5.26479	18.1989	0.200442	25.501	-0.191046	0.968047	0.986719	101.164	36.3918	-204.868
2019-03-28	727	07:37:30	29.0346	-80.0515	0	0	0	24.9907	35.8506	8.57233	164.594	138.734	0	0	1.05	334.577	9.87955	19.1271	0.188035	25.309	-0.113529	0.888089	0.895316	97.2849	36.3948	-169.8
2019-03-28	728	03:17:30	28.9459	-80.0569	0	0	0	24.9934	35.8324	8.99571	162.236	134.678	0	0	0.865294	236.165	73.8196	22.3265	0.237734	25.065	-0.0439467	0.911283	0.912342	92.761	36.3964	-145.153
2019-03-29	286	23:50:00	29.1093	-80.7928	0	0	0	18.277	32.0967	11.6183	160.006	132.593	1	0	0.335	310.43	4.13255	124.617	2.95909	19.275	-0.0714133	0.122074	0.141428	120.328	36.436	-18.6017
2019-03-29	330	20:45:10	29.0722	-80.79	0.211268	0.112676	0.0985915	18.1772	32.1239	11.68	159.418	134.779	0.394366	0	0.308636	308.596	6.41385	118.642	3.00588	19.273	-0.0531022	0.124516	0.135366	113.097	36.436	-18.3211
2019-03-29	331	15:30:06	29.0193	-80.7638	0.127273	0.0363636	0.109091	18.0752	32.2964	11.9611	159.407	133.097	0.0545455	0.0181818	0.4875	252.058	7.31034	122.596	3.00915	19.415	-0.061037	0.133671	0.146947	114.542	36.4391	-18.5944
2019-03-29	375	11:07:40	29.0165	-80.6887	0.2	0.04	0.18	18.136	32.3376	10.7444	159.42	132.571	0.02	0.04	0.553393	255.06	7.62554	138.551	2.91221	19.775	-0.0616474	0.151372	0.163444	112.159	36.4376	-18.4631
2019-03-29	419	07:27:30	29.0156	-80.6103	0	0	0	18.2237	32.3492	9.97266	160.392	133.507	0.263158	0	0.860566	263.418	7.7093	146.246	2.78874	20.312	-0.061037	0.169683	0.180327	109.784	36.433	-17.7062
2019-03-29	463	04:30:10	29.0146	-80.531	0.212121	0.212121	0	18.4169	32.1676	9.47539	161.498	134.765	0.212121	0	1.03292	265.801	7.25725	139.132	2.61235	20.947	-0.06592	0.196539	0.2073	108.542	36.4269	-21.6686
2019-03-29	507	01:32:31	29.0139	-80.4564	0.0263158	0	0.0263158	18.7631	32.3866	9.36568	161.956	137.284	0.447368	0	0.753333	257.198	34.5382	108.192	2.23682	21.529	-0.0738548	0.234993	0.246325	107.447	36.4147	-23.161
2019-03-30	286	00:10:00	29.1131	-80.7931	0	0	0	18.2866	32.134	11.6886	158.994	133.189	0.4	0	0.32	305.017	3.44726	115.197	2.90204	19.524	-0.0714133	0.122074	0.141428	120.328	36.436	-18.6017
2019-03-30	329	02:50:00	29.1294	-80.7629	0.118644	0.0508475	0.0847458	18.3689	32.1258	11.2184	159.62	135.535	0.0847458	0.40678	0.349857	93.1454	7.22307	112.888	2.89569	19.618	-0.0598163	0.11597	0.130488	117.284	36.4284	-19.6845
2019-03-30	374	07:17:30	29.1411	-80.6897	0.208333	0.0416667	0.1875	18.4166	32.1063	11.7563	159.384	133.269	0	0	0.3415	64.8795	7.73868	112.799	2.80727	19.871	-0.0598163	0.13184	0.144775	114.404	36.4299	-20.9042
2019-03-30	417	11:32:30	29.1527	-80.6111	0.0740741	0	0.0740741	18.674	32.3056	13.5051	159.17	130.757	0.333333	0.0555556	0.568113	66.3749	9.37485	125.437	2.69222	20.217	-0.06592	0.162969	0.175796	112.023	36.4269	-24.8588
2019-03-30	461	17:27:30	29.1667	-80.5159	0.181818	0.0113636	0.170455	19.1083	32.3865	16.3753	159.248	134.062	0.261364	0.227273	0.275455	206.95	3.11104	107.017	2.38298	20.965	-0.0701926	0.196539	0.208698	109.654	36.4208	-27.25
2019-03-30	505	22:32:30	29.1714	-80.4843	0.0882353	0.0588235	0.0294118	20.0001	32.6559	13.9901	159.16	135.766	0.529412	0.0294118	0.274444	322.436	3.55146	101.288	2.15423	21.339	-0.0701926	0.196539	0.208698	109.654	36.4208	-29.2028
2019-03-31	505	02:32:30	29.1767	-80.4483	0.16129	0.145161	0.0322581	21.3898	32.9235	11.3844	159.33	134.005	0.645161	0	0.231333	50.3753	6.45891	94.1862	1.87373	21.747	-0.0665303	0.237434	0.246579	105.653	36.4116	-29.2028
2019-03-31	549	08:57:30	29.1863	-80.3827	0.0217391	0.0108696	0.0108696	23.4395	34.2159	10.4737	159.606	132.17	0.108696	0.228261	0.381739	141.898	8.92714	72.9799	1.42678	22.331	-0.0665303	0.237434	0.246579	105.653	36.4116	-31.9943
2019-03-31	592	13:57:30	29.1996	-80.292	0	0	0	25.117	34.8057	11.6919	159.124	128.099	0	0.0357143	0.89	76.2571	11.6144	49.0269	0.89883	23.46	-0.0616474	0.290536	0.297005	101.98	36.4071	-44.1239
2019-03-31	636	23:23:30	29.2492	-80.1866	0.0714286	0.0714286	0	24.9926	34.9157	10.7317	159.034	128.828	0	0	1.24	350.858	4.75753	30.7202	0.231546	25.103	-0.0836207	0.734886	0.739628	96.4916	36.3964	-68.7268
2019-03-31	637	18:04:34	29.2117	-80.2103	0.0441176	0	0.0441176	24.7788	34.8722	14.2072	159.062	128.214	0	0	0.433529	112.564	2.60718	28.8101	0.271677	24.65	-0.0347911	0.417493	0.41894	94.7636	36.4025	-63.0538
2019-03-31	680	21:27:35	29.22	-80.1852	0.0833333	0	0.0833333	25.0301	34.9142	10.4183	159.45	131.092	0	0	0.553333	313.538	37.1068	28.828	0.245353	24.945	-0.0836207	0.734886	0.739628	96.4916	36.3964	-116.914
2019-04-01	459	22:23:30	29.3694	-80.5274	0.473684	0.473684	0.0789474	20.2726	32.4258	11.7996	159.271	134.324	0.578947	0	0.533	231.194	7.64393	77.7407	1.87978	20.967	-0.0665303	0.189215	0.20057	109.372	36.4132	-30.2169
2019-04-01	502	18:38:30	29.3839	-80.4503	0.0961538	0.0961538	0.0384615	21.1966	32.9502	11.4209	159.317	132.69	0.346154	0	0.749231	243.438	7.91905	75.2294	1.77	21.686	-0.0390637	0.207526	0.21117	100.66	36.4055	-29.1875
2019-04-01	546	14:48:30	29.3989	-80.3704	0.1	0	0.1	21.4586	33.3002	10.8872	159.392	132.404	0	0.1	0.686	241.543	6.62935	48.0587	1.52139	22.766	-0.0384533	0.265511	0.268281	98.2407	36.4025	-38.4779
2019-04-01	590	11:58:30	29.4116	-80.3035	0.357143	0.285714	0.285714	21.9891	33.1929	10.4739	159.353	129.834	0	0	1.04429	255.76	8.09643	31.4154	0.75113	23.703	-0.0384533	0.265511	0.268281	98.2407	36.4025	-48.4318
2019-04-01	634	09:08:30	29.4291	-80.2224	0.025	0	0.025	24.1067	33.7963	9.76217	159.767	132.541	0	0.2	1.008	266.058	11.053	33.0679	0.241388	24.867	-0.0555437	0.417493	0.421172	97.5782	36.3994	-82.9204
2019-04-01	635	02:38:30	29.3394	-80.1731	0	0	0	24.9085	34.9525	9.6805	158.81	129.164	0	0	1.64	1.75	7.54379	30.502	0.12214	25.131	-0.0714133	0.761742	0.765082	95.3558	36.3948	-75.1803
2019-04-01	636	00:33:30	29.2721	-80.1826	0	0	0	25.0219	34.9236	10.0035	158.926	129.676	0	0	1.35333	349.293	19.1088	31.1557	0.182103	24.772	-0.0836207	0.734886	0.739628	96.4916	36.3964	-68.7268
2019-04-01	677	06:18:30	29.4429	-80.1612	0.0714286	0	0.0714286	25.064	34.9254	9.45193	159.538	131.175	0.0357143	0	1.16	264.874	6.44254	32.1541	0.120415	25.318	-0.114139	0.786157	0.794399	98.2608	36.3918	-280.839
2019-04-01	678	03:58:30	29.385	-80.1591	0.107143	0	0.107143	24.9056	34.9904	9.75264	159.064	129.53	0	0	1.79714	5.84	8.32676	31.149	0.122186	25.314	-0.114139	0.786157	0.794399	98.2608	36.3918	-207.289
2019-04-01	679	01:48:30	29.3121	-80.1788	0	0	0	24.9318	34.9331	9.34656	158.98	130.343	0	0.0625	1.67	355.86	69.5729	30.4754	0.12759	24.924	-0.0714133	0.761742	0.765082	95.3558	36.3948	-145.311
2019-04-02	239	22:51:00	29.3001	-80.8962	0.148148	0.037037	0.111111	18.2343	30.92	10.336	159.492	132.904	0.037037	0	0.978333	248.713	6.19728	105.763	2.71993	18.718	-0.04944	0.144047	0.152296	108.943	36.3674	-17.5127
2019-04-02	283	20:36:00	29.3081	-80.8329	0.105263	0.0526316	0.0526316	18.4054	30.8305	9.71684	160.148	134.648	0.105263	0	1.02167	254.242	2.75235	103.017	2.56378	18.95	-0.0585955	0.142216	0.153814	112.393	36.3903	-19.6921
2019-04-02	284	21:33:30	29.3066	-80.8613	0	0	0	18.3588	30.825	10.0375	159.162	134.441	0.25	0	1.10667	256.28	9.36354	101.469	2.60572	18.836	-0.0585955	0.142216	0.153814	112.393	36.3903	-19.6638
2019-04-02	327	16:08:30	29.3206	-80.766	0.0795455	0.0113636	0.0795455	18.547	31.4111	10.4369	159.406	133.52	0.0795455	0	0.400893	199.012	8.11772	105.04	2.34959	19.144	-0.0665303	0.143437	0.158115	114.883	36.4055	-22.8169
2019-04-02	371	10:08:30	29.3376	-80.6846	0.178571	0	0.178571	18.7967	32.005	12.2172	159.166	131.495	0.0714286	0	0.671207	240.185	9.48701	100.107	2.04997	19.3	-0.0738548	0.14893	0.166237	116.377	36.4147	-25.5268
2019-04-02	414	04:18:30	29.3541	-80.5886	0.136364	0.0909091	0.0909091	19.0608	32.2489	11.5888	159.534	133.645	0.636364	0	0.47	186.601	3.44281	93.8499	1.7689	19.973	-0.0744652	0.158086	0.174746	115.222	36.4177	-28.7635
2019-04-02	415	06:58:30	29.3436	-80.622	0.15	0	0.15	18.8917	32.1365	11.6089	159.138	132.471	0.25	0	0.6865	226.816	6.02041	99.1666	1.91277	19.673	-0.0744652	0.158086	0.174746	115.222	36.4177	-28.2288
2019-04-02	459	01:13:30	29.3623	-80.5637	0.233333	0.2	0.0666667	19.4025	32.2033	11.4897	159.089	133.69	0.466667	0	0.405	184.816	45.1345	85.9564	1.70404	20.346	-0.0744652	0.158086	0.174746	115.222	36.4177	-30.2169
2019-04-03	194	12:43:30	29.4091	-81.0264	0.0172414	0	0.0172414	18.1512	30.8186	10.6465	158.698	132.058	0	0	0.634828	280.255	7.51509	102.362	2.93629	18.279	-0.0421155	0.126347	0.133181	108.435	36.2377	-18.924
2019-04-03	195	11:54:53	29.3448	-81.0027	0.0854701	0.00854701	0.0769231	18.1561	30.9193	11.1612	158.83	132.55	0.350427	0.017094	0.553645	295.501	5.79591	111.692	3.01847	18.331	-0.0518815	0.143437	0.152532	109.885	36.2926	-18.5634
2019-04-03	196	13:59:04	29.2957	-80.9827	0.11828	0.0967742	0.0430108	18.268	30.9875	11.4718	158.936	132.84	0.473118	0	0.438971	236.291	3.74841	115.965	3.00087	18.376	-0.0518815	0.143437	0.152532	109.885	36.2926	-11.5568
2019-04-03	239	00:48:30	29.2949	-80.9441	0	0	0	18.1443	31.0665	10.1909	159.395	132.887	0	0	0.7515	244.21	3.87515	110.96	2.85035	18.522	-0.04944	0.144047	0.152296	108.943	36.3674	-17.5127
2019-04-04	196	11:58:30	29.2946	-80.984	0.180556	0.0381944	0.149306	18.4537	31.0821	12.7191	158.383	131.748	0.0520833	0.0381944	0.564643	186.771	0.0471001	169.692	3.37991	18.454	-0.0518815	0.143437	0.152532	109.885	36.2926	-11.5568
2019-04-05	196	11:58:30	29.295	-80.9842	0.204861	0.107639	0.152778	18.5665	31.5168	14.0787	158.715	133.269	0.263889	0.0277778	0.521316	274.314	6.09562	156.045	3.26307	18.5	-0.0518815	0.143437	0.152532	109.885	36.2926	-11.5568
2019-04-06	195	17:38:30	29.3497	-80.9799	0.12963	0.0277778	0.101852	18.8198	31.8886	15.7933	158.943	137.248	0.00925926	0.111111	0.458148	288.957	5.76288	108.072	2.76973	20.785	-0.0518815	0.143437	0.152532	109.885	36.2926	-18.5634
2019-04-06	196	06:33:30	29.298	-80.9847	0.101266	0.0126582	0.0886076	18.7278	31.7165	17.0199	158.492	132.458	0.259494	0.0189873	0.541667	302.929	8.71719	118.691	2.88025	20.832	-0.0518815	0.143437	0.152532	109.885	36.2926	-11.5568
2019-04-06	238	23:03:30	29.3734	-80.9598	0.136364	0.0909091	0.0454545	18.8331	32.2382	13.5328	159.399	135.309	0.0454545	0	0.46	328.857	3.67321	111.214	2.64743	20.883	-0.0518815	0.143437	0.152532	109.885	36.2926	-17.6023
2019-04-07	238	04:03:30	29.3802	-80.9227	0.102041	0.0102041	0.0918367	19.5527	32.6405	13.5362	158.582	130.446	0.469388	0.122449	0.3424	177.938	8.64514	113.485	2.35666	20.882	-0.0457778	0.14832	0.155224	107.152	36.3338	-17.6023
2019-04-07	283	14:18:30	29.3523	-80.8395	0.0945946	0.0743243	0.027027	20.9583	33.256	16.6046	158.778	128.35	0.0878378	0.216216	0.146757	210.958	5.10125	106.111	2.14011	21.217	-0.0585955	0.142216	0.153814	112.393	36.3903	-19.6921
2019-04-07	327	22:13:30	29.3409	-80.7885	0.333333	0.190476	0.166667	21.5665	34.1021	13.8982	159.13	134.864	0.142857	0	0.305455	284.089	4.40143	103.79	2.00205	21.343	-0.0665303	0.143437	0.158115	114.883	36.4055	-22.8169
2019-04-08	326	04:58:30	29.3478	-80.7438	0	0	0	23.2938	35.2842	11.5243	159.391	133.086	0.916667	0	0.586667	74.86	3.23286	156.504	1.53897	21.547	-0.0665303	0.143437	0.158115	114.883	36.4055	-23.7528
2019-04-08	327	02:13:30	29.3428	-80.7766	0.0925926	0.0185185	0.0740741	22.4104	35.0911	11.3743	159.339	133.427	0.62963	0	0.335385	210.457	9.05809	100.921	1.60817	21.341	-0.0665303	0.143437	0.158115	114.883	36.4055	-22.8169
2019-04-08	371	08:08:30	29.3571	-80.6846	0.078125	0	0.078125	24.754	35.3959	11.1023	159.25	129.772	0.25	0	0.48625	76.17	7.51717	160.633	1.18482	21.868	-0.0738548	0.14893	0.166237	116.377	36.4147	-25.5268
2019-04-08	414	13:48:30	29.369	-80.6083	0.0138889	0	0.0138889	25.1311	35.4194	10.6277	159.281	131.378	0.0138889	0.180556	0.328333	52.9628	7.28777	95.7717	0.653102	23.14	-0.0744652	0.158086	0.174746	115.222	36.4177	-28.7635
2019-04-08	459	17:58:30	29.3806	-80.5343	0.0357143	0	0.0357143	25.1417	35.3	10.1551	159.555	132.063	0.0357143	0	0.832857	70.5143	8.25075	57.4127	0.414117	24.453	-0.0427259	0.184942	0.189813	103.008	36.4132	-30.2169
2019-04-08	502	21:28:30	29.3937	-80.4505	0	0	0	24.9945	35.1823	9.69932	159.615	134.617	0.428571	0	0.686429	67.8043	4.26871	42.1975	0.303746	24.297	-0.0390637	0.207526	0.21117	100.66	36.4055	-29.1875
2019-04-08	546	23:53:30	29.4005	-80.4071	0	0	0	25.084	34.76	8.907	159.261	129.899	0	0	0.29	24.78	3.49102	38.52	0.274457	24.453	-0.0390637	0.207526	0.21117	100.66	36.4055	-38.4779
2019-04-09	546	02:23:30	29.4063	-80.3717	0.0517241	0.0517241	0.0172414	24.7573	34.6552	9.02693	159.888	132.841	0.12069	0.0172414	0.562857	46.9171	7.1994	45.9391	0.332437	24.217	-0.0384533	0.265511	0.268281	98.2407	36.4025	-38.4779
2019-04-09	590	05:48:30	29.4175	-80.2985	0.125	0.125	0.0416667	24.2712	34.8808	10.8208	159.323	131.156	0	0	1.16833	68.1633	35.9818	38.674	0.275705	24.31	-0.0384533	0.265511	0.268281	98.2407	36.4025	-48.4318
2019-04-09	630	22:53:30	29.7298	-80.2007	0.0384615	0	0.0384615	24.805	35.4996	11.8805	159.167	129.956	0	0	1.35857	339.986	33.3912	30.864	0.210195	24.724	-0.028077	0.927763	0.928187	91.7334	36.3826	-177.083
2019-04-09	634	08:28:30	29.4299	-80.2196	0.1	0	0.1	24.7591	34.6685	14.5183	159.042	130.371	0	0	1.176	67.183	29.4603	25.6325	0.16442	24.765	-0.0555437	0.417493	0.421172	97.5782	36.3994	-82.9204
2019-04-09	674	20:48:30	29.6916	-80.172	0.0416667	0	0.0416667	24.6561	35.4379	12.3735	158.308	129.285	0	0.208333	1.74333	352.13	8.14153	28.0912	0.186054	24.831	-0.0482192	0.947295	0.948521	92.914	36.3826	-364.13
2019-04-09	675	18:18:30	29.6191	-80.16	0	0	0	24.3981	35.205	11.5601	158.354	128.178	0	0	1.87111	42.3278	8.55221	25.5763	0.163924	25.057	-0.0994903	0.941801	0.947042	96.0303	36.3857	-359.667
2019-04-09	676	15:08:30	29.5423	-80.1635	0	0	0	24.599	34.8227	10.3994	158.669	128.44	0	0	1.95	355.838	8.77561	47.3304	0.166348	25.175	-0.0994903	0.941801	0.947042	96.0303	36.3857	-332.254
2019-04-09	677	11:48:30	29.4634	-80.1595	0	0	0	24.8774	34.359	10.5262	158.858	129.916	0	0	1.541	223.337	45.6671	61.6897	0.14964	24.981	-0.144047	0.863063	0.875002	99.4755	36.3887	-280.839
2019-04-10	497	19:42:00	29.7928	-80.4416	0.0291262	0.0291262	0.0194175	24.7911	35.1879	12.788	158.928	129.076	0.466019	0.0291262	0.405385	218.053	7.05024	70.7518	0.500344	23.833	-0.0225837	0.258187	0.259172	94.999	36.4025	-38.4704
2019-04-10	541	13:14:30	29.7862	-80.369	0.25	0.0961538	0.192308	24.8949	35.5596	12.498	159.07	125.36	0.0961538	0	0.693846	284.755	6.78986	54.9921	0.39759	24.119	-0.0238044	0.354015	0.354814	93.8469	36.3979	-45.6836
2019-04-10	585	06:34:30	29.7983	-80.3	0.0740741	0.00925926	0.0648148	24.8549	35.5231	11.3239	158.863	128.29	0.175926	0.0648148	0.660741	250.423	7.72674	37.5301	0.266389	24.895	-0.0250252	0.37843	0.379256	93.7834	36.3979	-58.0704
2019-04-10	630	01:02:00	29.7575	-80.2352	0	0	0	24.9181	35.484	11.9018	159.046	131.346	0	0.32	1.21	331.697	48.197	32.1839	0.221553	25.453	-0.0311289	0.584124	0.584953	93.0505	36.3918	-177.083
2019-04-11	322	21:52:00	29.7067	-80.7309	0	0	0	21.9906	34.3361	12.1454	157.775	134.694	0.333333	0.0392157	0.39	221.295	3.88271	163.086	1.41911	22.155	0.0256355	0.125736	0.128323	78.4763	36.3201	-26.1051
2019-04-11	366	17:24:30	29.7048	-80.6908	0.303571	0.0892857	0.232143	21.4927	33.9648	11.2297	157.756	128.259	0	0.0535714	0.487143	229.659	11.4583	162.751	1.22827	22.363	0.028077	0.145878	0.148556	79.1056	36.3643	-26.705
2019-04-11	409	06:54:30	29.7499	-80.5841	0.204545	0.0681818	0.181818	23.6223	34.7673	13.7176	157.682	130.651	0.136364	0.0909091	0.221818	202.265	4.68948	131.753	0.89375	22.829	0.0134281	0.167241	0.16778	85.4095	36.3887	-30.8814
2019-04-11	410	11:54:30	29.7135	-80.6086	0.0394737	0	0.0394737	23.0171	33.7207	12.639	157.698	128.616	0.0263158	0	0.52	197.438	8.72151	133.789	0.909386	22.683	0.0134281	0.167241	0.16778	85.4095	36.3887	-29.1311
2019-04-11	454	03:24:30	29.762	-80.5376	0.1	0.05	0.05	24.4056	35.0042	13.7052	157.643	133.458	0.625	0.325	0.904	277.522	5.80062	109.964	0.742202	23.571	0.00183111	0.195318	0.195327	89.4629	36.4086	-33.941
2019-04-11	497	00:52:00	29.776	-80.4797	0.142857	0.0952381	0.047619	24.588	34.8962	12.5593	157.716	133.163	0.333333	0.285714	0.714	262.786	53.4047	78.4613	0.547813	24.025	0.00183111	0.195318	0.195327	89.4629	36.4086	-38.4704
2019-04-12	146	23:52:00	29.6978	-81.0254	0.333333	0	0.333333	18.9643	32.3633	15.7453	156.852	145.896	0	1	0.57	265.99	3.07751	115.628	2.13494	22.445	-0.011597	0.0903348	0.0910762	97.3155	35.9905	-17.9858
2019-04-12	190	22:14:30	29.7026	-80.9941	0.138889	0	0.138889	19.2492	32.1722	11.6488	158.079	142.058	0	1	0.59	272.459	6.69872	116.144	2.11748	22.394	-0.011597	0.0903348	0.0910762	97.3155	35.9905	-19.6199
2019-04-12	234	18:44:30	29.7131	-80.9258	0.270833	0.0416667	0.270833	19.0638	32.4215	9.30635	158.203	132.091	0	0.125	0.6875	267.353	9.06621	131.008	1.83889	22.405	-0.00976592	0.0872829	0.0878276	96.3842	36.0988	-22.4943
2019-04-12	278	14:24:30	29.7274	-80.8333	0	0	0	19.9081	32.5779	9.62818	158.158	130.805	0	0	0.552857	254.959	7.80639	129.141	1.56766	22.397	-0.00122074	0.0982696	0.0982772	90.7117	36.1995	-22.5513
2019-04-12	321	07:39:57	29.739	-80.7536	0.0909091	0.0681818	0.0227273	21.4539	32.9957	13.3875	157.65	130.484	0.159091	0.0227273	0.232727	252.768	0.951925	162.253	1.21659	22.697	0.00854518	0.114139	0.114459	85.7185	36.2774	-26.1211
2019-04-12	322	05:10:49	29.7316	-80.7585	0.0941176	0.0117647	0.0823529	21.725	33.6324	12.5441	157.633	132.096	0.258824	0.0823529	0.283333	255.937	2.31747	163.335	1.24402	22.639	0.00854518	0.114139	0.114459	85.7185	36.2774	-26.1051
2019-04-12	366	06:04:30	29.7357	-80.735	0.0625	0.0625	0	21.7611	33.2987	14.9948	157.897	135.023	0.875	0	0.3525	110.823	44.6091	157.692	1.13961	22.719	0.00854518	0.114139	0.114459	85.7185	36.2774	-26.705
2019-04-13	57	17:24:30	29.7805	-81.1942	0.5	0.0416667	0.458333	18.8302	32.175	14.1541	157.743	134.629	0.5	0	0.978333	342.037	8.81015	111.586	2.32132	22.183	-0.0421155	0.111087	0.118803	110.763	35.6822	-9.7642
2019-04-13	58	13:04:30	29.7016	-81.1852	0.0625	0	0.0625	18.9205	32.4281	11.0218	157.171	131.407	0	0	0.56	324.848	13.3637	111.015	2.35436	22.216	-0.0311289	0.11475	0.118897	105.178	35.7097	-1.06534
2019-04-13	101	21:12:00	29.8212	-81.1714	0.58209	0.119403	0.522388	18.8354	32.1531	11.8056	158.418	145.008	0.0149254	0.686567	0.458824	132.435	9.75854	183.136	2.28517	22.094	-0.00976592	0.101932	0.102399	95.4727	35.5983	-16.4062
2019-04-13	102	15:04:30	29.7349	-81.1895	0.1875	0	0.1875	18.84	32.4138	13.6472	157.871	132.775	0.03125	0.09375	0.77875	331.736	6.30504	111.317	2.33668	22.191	-0.0421155	0.111087	0.118803	110.763	35.6822	-17.6404
2019-04-13	103	08:54:30	29.6849	-81.1586	0.369048	0.0238095	0.369048	18.9518	32.3449	12.5379	157.772	132.711	0	0	0.368571	301.636	7.64196	192.32	2.30281	22.205	-0.0311289	0.11475	0.118897	105.178	35.7097	-17.6592
2019-04-13	146	02:42:00	29.6932	-81.0801	0.276923	0	0.276923	18.9826	32.3268	14.7616	157.339	135.548	0.0153846	0.307692	0.79	294.78	15.6555	190.288	2.0415	22.138	-0.0201422	0.0903348	0.0925531	102.57	35.8409	-17.9858
2019-04-14	101	00:42:00	29.8289	-81.1232	0.588235	0	0.588235	19.2591	32.1188	11.2789	158.386	139.132	0.0588235	0.882353	0.455	59.82	5.32851	180.449	2.1396	21.759	-0.0109867	0.0872829	0.0879717	97.1743	35.7341	-16.4062
2019-04-14	144	04:34:30	29.837	-81.0688	0.447368	0.157895	0.447368	19.4522	32.4338	10.0739	157.837	131.895	0.157895	0	0.415263	34.5805	6.15786	178.242	1.97082	21.948	-0.0109867	0.0872829	0.0879717	97.1743	35.7341	-18.9152
2019-04-14	189	09:14:30	29.8466	-81.0059	0	0	0	20.6752	32.5553	9.07278	158.068	130.535	0.0277778	0	0.687778	61.5389	8.20618	138.028	1.75476	22.325	-0.0134281	0.0817896	0.0828846	99.3236	35.9203	-20.2096
2019-04-14	232	12:34:30	29.8568	-80.9216	0.0227273	0	0.0227273	22.0258	32.8211	9.24643	158.228	131.363	0	0	1.03636	75.46	8.49563	161.818	1.45015	22.663	-0.0158696	0.0878933	0.0893145	100.235	36.0698	-23.1466
2019-04-14	276	16:14:30	29.8688	-80.8346	0.0227273	0	0.0227273	22.8522	33.7082	9.36936	158.258	134.344	0	0	0.548182	70.57	6.15756	159.535	1.1666	22.642	-0.0152593	0.0927763	0.0940228	99.34	36.1736	-26.3362
2019-04-14	320	20:14:30	29.8776	-80.7716	0.134615	0.115385	0.0769231	23.7043	33.6038	9.50129	158.061	133.238	0.115385	0	0.526923	58.74	6.37479	142.063	0.976937	22.644	-0.0408948	0.0982696	0.106439	112.595	36.2728	-28.5988
2019-04-14	364	23:12:00	29.8867	-80.7063	0	0	0	23.6377	34.6858	9.17811	158.252	134.041	0	0.157895	1.098	70.426	4.81335	122.911	0.829233	22.691	-0.0421155	0.119022	0.126254	109.486	36.3201	-32.733
2019-04-15	364	00:52:00	29.8935	-80.657	0	0	0	23.7817	34.9824	8.81314	157.942	132.144	0.047619	0	1.1	74.198	5.41841	112.555	0.759069	23.331	-0.0421155	0.119022	0.126254	109.486	36.3201	-32.733
2019-04-15	407	02:54:30	29.9012	-80.6015	0	0	0	24.3256	35.085	8.35661	158.211	132.451	0.428571	0	0.935714	72.3629	6.37336	93.7257	0.640573	23.254	-0.044557	0.162969	0.16895	105.291	36.3796	-36.452
2019-04-15	452	06:04:30	29.9103	-80.5362	0	0	0	24.8601	35.41	8.36635	158.702	133.835	0.125	0	0.765	59.1625	8.07762	71.952	0.507809	23.67	-0.0421155	0.209357	0.213551	101.374	36.4071	-37.3864
2019-04-15	495	09:25:21	29.9217	-80.4534	0	0	0	24.9872	35.3081	8.70634	158.644	133.952	0	0	1.33375	72.9813	8.89292	49.3774	0.357857	24.775	-0.0262459	0.261238	0.262554	95.7371	36.4025	-41.3887
2019-04-15	539	11:55:30	29.9342	-80.3623	0	0	0	24.9408	35.1	8.548	159.046	133.565	0	0.5	1.66667	81.8167	3.15937	48.6444	0.259689	25.093	-0.00244148	0.372936	0.372944	90.3751	36.3964	-45
2019-04-15	540	11:05:30	29.9298	-80.3946	0	0	0	24.9574	35.11	8.833	157.76	131.786	0	0	1.565	80.645	9.95033	50.0517	0.291665	25.036	-0.0262459	0.261238	0.262554	95.7371	36.4025	-44.6496
2019-04-15	583	14:05:30	29.9438	-80.2926	0	0	0	25.1029	35.3723	8.87005	158.382	131.879	0	0.075	1.065	83.987	21.4564	38.0498	0.215169	25.155	-0.00244148	0.372936	0.372944	90.3751	36.3964	-57.8085
2019-04-15	625	23:33:00	30.119	-80.1992	0	0	0	25.9377	35.4709	9.36736	158.583	132.161	0	0.0909091	2.79667	4.1	7.3214	34.0291	0.175041	25.632	0.0982696	0.845973	0.851662	83.3741	36.3842	-153.588
2019-04-15	626	22:15:30	30.054	-80.2114	0	0	0	25.9848	35.506	9.2398	158.47	132.06	0	0	2.636	1.164	9.58836	39.8458	0.178434	25.298	0.0738548	0.512711	0.518003	81.8031	36.3933	-176.808
2019-04-15	627	18:35:30	29.9688	-80.227	0	0	0	25.6264	35.5209	9.60116	157.629	129.967	0	0.0294118	0.904118	204.739	74.6045	36.2511	0.188621	25.239	0.0451674	0.574969	0.57674	85.5083	36.3918	-190.295
2019-04-16	574	21:33:00	30.6369	-80.2988	0	0	0	24.084	35.0083	10.9844	157.926	131.498	0.254237	0.20339	0.992667	292.961	9.92142	47.9839	0.46042	23.428	0.0836207	0.1648	0.184801	63.0964	36.3918	-39.7042
2019-04-16	619	16:55:30	30.6079	-80.2008	0.0384615	0	0.0384615	24.5649	34.8	10.3205	157.907	130.743	0	0.153846	0.900769	220.451	11.1721	41.4412	0.31996	24.467	0.13245	0.341807	0.366572	68.8187	36.3933	-44.3006
2019-04-16	620	12:15:30	30.5108	-80.1708	0	0	0	24.7615	35.075	9.24875	157.961	127.438	0	0.25	1.55	16.1	7.85509	28.6285	0.214409	25.289	0.173345	0.451674	0.483795	69.004	36.3918	-47.8604
2019-04-16	621	08:45:30	30.4408	-80.1818	0.0833333	0	0.0833333	25.4554	35.0646	9.39933	158.447	131.453	0	0	1.755	295.938	26.8339	25.7343	0.204124	25.561	0.136113	0.572527	0.588485	76.6268	36.3903	-56.9206
2019-04-16	624	01:05:30	30.1995	-80.1789	0	0	0	25.9036	35.4487	9.38712	158.351	131.331	0	0.125	2.93	7.645	5.43252	25.7635	0.14289	26.112	0.11475	0.782495	0.790864	81.6573	36.3857	-124.729
2019-04-16	625	00:13:00	30.1518	-80.1914	0	0	0	25.971	35.466	9.0442	157.267	131.15	0	0	2.94	5.87	44.9384	28.9143	0.159544	25.863	0.11475	0.782495	0.790864	81.6573	36.3857	-153.588
2019-04-16	663	13:35:30	30.5556	-80.1726	0.0357143	0	0.0357143	24.5152	35.1393	10.147	157.913	129.616	0	0.285714	1.75571	14.0414	7.99998	33.1755	0.24839	24.973	0.13245	0.341807	0.366572	68.8187	36.3933	-105.206
2019-04-16	664	10:55:30	30.4838	-80.1779	0.0714286	0	0.0714286	24.9138	34.9618	8.78254	158.209	130.737	0	0.107143	1.55571	61.4829	10.5254	27.06	0.208191	25.387	0.173345	0.451674	0.483795	69.004	36.3918	-154.942
2019-04-16	665	06:35:30	30.3892	-80.1736	0	0	0	25.7005	35.2146	9.78846	158.028	129.878	0	0	1.94429	350.731	7.71608	23.8467	0.175054	25.716	0.136113	0.572527	0.588485	76.6268	36.3903	-194.311
2019-04-16	666	03:55:30	30.3205	-80.1629	0	0	0	25.767	35.3394	9.22972	157.805	130.555	0	0	2.20444	316.742	8.19975	22.7838	0.153276	25.991	0.101932	0.655538	0.663415	81.1617	36.3903	-228.051
2019-04-16	667	01:55:30	30.2468	-80.1679	0	0	0	25.8408	35.4558	9.17492	157.603	131.543	0	0.333333	3.25333	5.71333	8.37789	24.3242	0.145513	26.069	0.108036	0.714743	0.722862	81.4046	36.3872	-258.633
2019-04-16	668	00:35:30	30.1731	-80.1859	0	0	0	25.9555	35.45	8.829	157.399	130.93	0	0	2.94	7.03	51.7297	25.5457	0.158508	25.937	0.11475	0.782495	0.790864	81.6573	36.3857	-278.692
2019-04-17	444	22:53:00	30.5424	-80.5138	0	0	0	23.6957	34.9852	10.1497	158.036	130.583	0.0740741	0.259259	0.67	283.917	14.5029	54.7938	0.644886	22.995	0.0360118	0.0616474	0.0713951	59.7083	36.3994	-32.9886
2019-04-17	486	10:25:30	30.6305	-80.4022	0	0	0	23.9806	34.5475	10.5801	156.772	129.314	0	0	0.685	335.28	9.09918	36.1786	0.477814	23.564	0.03296	0.06592	0.0737008	63.4349	36.3933	-35.2563
2019-04-17	487	19:55:30	30.5652	-80.4594	0.0227273	0.0227273	0	24.0207	34.335	10.7113	157.557	129.828	0.113636	0.295455	1.16455	256.646	12.5471	61.5905	0.528334	23.175	0.0360118	0.0616474	0.0713951	59.7083	36.3994	-35.1437
2019-04-17	530	08:11:20	30.6443	-80.3659	0.0520833	0.0104167	0.0416667	23.8926	35.0659	11.357	157.624	128.828	0.0729167	0.15625	0.446667	107.24	3.16966	47.0687	0.458097	23.994	0.0335704	0.0750755	0.0822393	65.908	36.3918	-38.0401
2019-04-17	531	11:16:41	30.6212	-80.3853	0.032967	0.010989	0.021978	24.2806	34.6962	13.1609	157.219	127.378	0.0659341	0.021978	0.738636	260.595	5.265	51.6468	0.42506	23.781	0.0335704	0.0646992	0.0728901	62.5766	36.3918	-37.372
2019-04-17	574	03:05:30	30.6443	-80.3373	0.363636	0.136364	0.272727	24.3739	35.2891	12.5156	157.541	130.125	0	0	0.478333	223.56	45.9387	52.0041	0.375472	24.335	0.0335704	0.0750755	0.0822393	65.908	36.3918	-39.7042
2019-04-18	358	19:25:30	30.3359	-80.6563	0.0625	0	0.0625	23.5943	33.8656	10.584	157.838	133.912	0.03125	0.21875	0.7675	243.255	4.61796	78.0132	0.54825	22.912	0.0268563	0.0842311	0.0884089	72.3156	36.4193	-31.2366
2019-04-18	359	22:23:00	30.3106	-80.6945	0.025641	0.025641	0	23.613	34.1669	9.67351	158.066	132.954	0.025641	0	0.692	284.796	11.7057	71.0931	0.55133	22.919	0.0268563	0.0842311	0.0884089	72.3156	36.4193	-30.4659
2019-04-18	401	12:55:30	30.3961	-80.6232	0.00925926	0	0.00925926	23.3376	34.3297	10.8698	157.831	132.041	0	0.259259	0.562143	195.893	4.49502	68.4994	0.533906	22.818	0.0256355	0.0677511	0.0724389	69.2744	36.4071	-31.7236
2019-04-18	402	17:45:30	30.3571	-80.6355	0	0	0	23.3528	34.26	11.8231	158.334	133.939	0	0.25	0.395	209.98	19.9486	78.8771	0.47652	22.908	0.0268563	0.0842311	0.0884089	72.3156	36.4193	-32.6047
2019-04-18	444	02:43:00	30.5048	-80.5175	0.0307692	0	0.0307692	23.3964	34.5692	10.5687	157.738	129.587	0.0923077	0	0.318125	173.588	6.91081	55.6341	0.424232	23.147	0.028077	0.0604266	0.0666311	65.0782	36.3964	-32.9886
2019-04-18	445	06:55:30	30.4507	-80.5529	0	0	0	23.3087	34.4019	10.3901	157.761	131.26	0.111111	0.111111	0.921111	240.012	22.8511	73.7064	0.409183	23.025	0.0256355	0.0677511	0.0724389	69.2744	36.4071	-35.0059
2019-04-19	359	03:11:02	30.2833	-80.691	0	0	0	23.7241	34.7591	9.72918	157.953	129.76	0	0	0.460526	113.385	9.63339	71.9266	0.604501	23.059	0.0244148	0.0866726	0.0900456	74.268	36.4193	-30.4659
2019-04-19	403	10:42:37	30.2153	-80.6288	0	0	0	24.1379	34.5135	9.22653	158.171	131.77	0	0	0.381923	202.464	4.98764	63.9141	0.496641	23.4	0.0244148	0.0866726	0.0900456	74.268	36.4193	-32.5385
2019-04-19	404	19:33:00	30.1854	-80.5901	0.0186916	0.0186916	0.00934579	23.7138	34.4289	9.305	158.147	133.208	0	0	0.521111	216.745	15.5823	62.9543	0.426061	23.627	0.00061037	0.0646992	0.0647021	89.4595	36.4116	-33.6045
2019-04-20	362	23:13:00	30.0548	-80.6487	0.0526316	0.0526316	0	22.5122	35.4021	10.0034	157.822	132.841	0	0.157895	0.71	249.108	18.0404	71.2118	0.899497	23.304	-0.0195318	0.0793481	0.0817167	103.829	36.4223	-34.2394
2019-04-20	403	03:15:30	30.2096	-80.5926	0	0	0	22.9246	34.7531	9.66375	158.225	133.593	0	0	0.853333	48.6544	4.52155	72.0753	0.618637	23.174	0.021363	0.0671407	0.0704575	72.3499	36.4086	-32.5385
2019-04-20	404	11:27:58	30.1712	-80.6079	0.0413793	0.00689655	0.0344828	23.0327	35.0676	9.57014	157.92	132.459	0	0	0.418889	238.397	8.91312	63.9861	0.67813	23.257	0.00061037	0.0646992	0.0647021	89.4595	36.4116	-33.6045
2019-04-20	405	20:25:30	30.0937	-80.6317	0	0	0	22.7755	35.3752	9.54296	158.036	132.969	0.0625	0	0.681667	213.327	13.8201	62.5944	0.824309	23.27	-0.0195318	0.0793481	0.0817167	103.829	36.4223	-35.8997
2019-04-20	448	06:25:30	30.2057	-80.5695	0.05	0	0.05	22.9495	34.9108	9.56725	157.908	131.978	0	0	0.504	115.227	20.9206	73.4709	0.597563	23.206	0.00061037	0.0646992	0.0647021	89.4595	36.4116	-34.9233
2019-04-21	362	03:03:00	30.0338	-80.6579	0	0	0	22.3651	35.4195	10.1715	157.879	131.948	0.0958904	0.0958904	0.239444	247.017	5.35323	43.7212	1.05628	22.699	-0.0299081	0.0756859	0.0813809	111.562	36.4254	-34.2394
2019-04-21	363	07:55:30	29.9859	-80.652	0	0	0	22.1901	35.2722	10.9062	157.782	129.285	0.0277778	0.138889	0.548889	170.714	2.89569	40.5233	1.2341	22.636	-0.0299081	0.0756859	0.0813809	111.562	36.4254	-34.4513
2019-04-21	406	06:15:30	30.0113	-80.6588	0	0	0	22.2357	35.3125	10.7127	157.618	129.784	0	0	0.2	168.69	9.57268	41.9301	1.185	22.648	-0.0299081	0.0756859	0.0813809	111.562	36.4254	-37.1368
2019-04-21	407	12:55:30	29.9298	-80.6268	0.0714286	0	0.0714286	22.6904	35.331	11.4348	157.706	127.341	0.142857	0.0119048	0.342857	201.739	8.32087	39.7658	1.29986	22.774	-0.0305185	0.077517	0.0833083	111.49	36.4299	-36.452
2019-04-21	408	18:16:15	29.8603	-80.5949	0.159091	0.159091	0.0454545	22.6464	35.3655	17.2271	157.316	126.462	0.0681818	0.204545	0.729091	155.719	7.66687	44.8624	1.2123	22.875	-0.0122074	0.0762963	0.0772667	99.0903	36.4284	-34.6991
2019-04-21	409	23:04:00	29.7932	-80.5766	0.0434783	0	0.0434783	22.6235	35.3539	18.3763	158.001	134.309	0.173913	0.391304	0.776667	253.335	1.94441	43.1128	1.01454	23.161	-0.0122074	0.0762963	0.0772667	99.0903	36.4284	-30.8814
2019-04-21	453	21:06:30	29.8104	-80.573	0	0	0	22.6485	35.3762	19.3776	157.645	134.939	0.125	1	0.683333	195.673	2.13234	44.8825	1.08803	23.016	-0.0122074	0.0762963	0.0772667	99.0903	36.4284	-34.8282
2019-04-22	408	05:26:30	29.8224	-80.5902	0	0	0	22.7293	35.4169	15.8366	157.766	130.564	0.40625	0.1875	0.3425	51.8338	2.7361	42.3993	0.949445	23.061	-0.0122074	0.0762963	0.0772667	99.0903	36.4284	-34.6991
2019-04-22	409	02:04:00	29.7993	-80.5998	0.0204082	0.0204082	0	22.5002	35.3402	17.1996	157.759	131.776	0.204082	0.306122	0.680833	301.197	4.19515	42.1904	0.81113	23.205	-0.0122074	0.0762963	0.0772667	99.0903	36.4284	-30.8814
2019-04-22	453	10:19:00	29.8062	-80.557	0.0470588	0.0117647	0.0352941	22.6152	35.3994	12.8344	157.736	126.485	0.0117647	0.2	0.37	180.842	7.14296	41.0366	0.993116	22.906	-0.0122074	0.0762963	0.0772667	99.0903	36.4284	-34.8282
2019-04-22	454	16:31:30	29.7434	-80.5413	0.109375	0.015625	0.109375	22.675	35.3905	16.1667	157.076	126.109	0.046875	0.296875	0.5375	167.248	9.81893	36.526	1.02139	22.791	0.00488296	0.0781274	0.0782798	86.4237	36.4269	-33.941
2019-04-22	455	21:21:30	29.6579	-80.5159	0	0	0	22.8852	35.3648	16.766	157.832	135.228	0	0.846154	0.811538	185.445	4.70989	36.7424	1.19904	22.863	0.0134281	0.0836207	0.084692	80.8771	36.4269	-30.3155
2019-04-22	456	23:46:30	29.6164	-80.5256	0	0	0	22.9658	35.3633	16.8865	157.716	132.489	0.166667	0.166667	0.655	217.565	10.3821	164.535	1.35878	22.849	0.0122074	0.0860622	0.0869237	81.9268	36.4269	-29.6732
2019-04-23	412	13:11:30	29.5454	-80.5952	0.145833	0.00694444	0.145833	23.1715	35.4715	16.0597	157.513	127.924	0.00694444	0.145833	0.351944	205.549	8.03306	100.567	0.545351	23.193	0.0158696	0.112308	0.113424	81.9571	36.4315	-23.6182
2019-04-23	413	21:36:30	29.474	-80.6085	0	0	0	23.1452	35.4438	17.7851	157.715	134.034	0.172414	0.551724	0.446	184.453	13.4395	77.9751	0.564836	23.14	-0.00915555	0.111698	0.112072	94.6859	36.4315	-24.6969
2019-04-23	456	03:36:30	29.5883	-80.5632	0.0348837	0	0.0348837	23.0811	35.4137	18.3042	157.741	131.464	0.151163	0	0.392381	191.908	21.9321	109.945	0.597187	23.066	0.0158696	0.112308	0.113424	81.9571	36.4315	-29.6732
2019-04-24	370	12:56:30	29.4217	-80.6846	0.075188	0.0075188	0.0676692	23.5318	35.4174	16.6542	157.74	131.701	0.0676692	0.300752	0.330299	205.733	5.71136	55.1768	0.358237	23.481	-0.0469985	0.13184	0.139967	109.62	36.4391	-25.7771
2019-04-24	413	00:56:30	29.4409	-80.6299	0	0	0	23.3328	35.4091	18.3182	157.678	132.04	0.454545	0	0.474	241.132	28.2158	100.282	0.361566	23.107	-0.0469985	0.13184	0.139967	109.62	36.4391	-24.6969
2019-04-25	239	23:24:00	29.3327	-80.8933	0.133333	0.0666667	0.0666667	24.1405	34.6993	12.9649	158.565	143.851	0	1	0.4925	281.137	5.58088	78.8573	0.629074	23.977	-0.0573748	0.153813	0.164166	110.456	36.4895	-17.5127
2019-04-25	283	15:46:30	29.3544	-80.8414	0.0238095	0	0.0238095	23.9755	35.0193	14.3912	158.145	138.002	0.077381	0.64881	0.284762	264.068	7.29463	43.7273	0.479674	24.105	-0.061037	0.14893	0.160953	112.286	36.4711	-19.6921
2019-04-25	326	04:29:00	29.3828	-80.7735	0.0291262	0.0194175	0.00970874	23.8864	35.3216	16.424	157.687	130.738	0.213592	0.00970874	0.446667	250.471	5.4218	40.7656	0.384372	24.203	-0.0482192	0.146489	0.154221	108.22	36.4513	-23.7528
2019-04-27	196	12:01:30	29.295	-80.9831	0.0625	0.00347222	0.0590278	23.9784	34.7173	13.3153	157.657	136.092	0.0902778	0.434028	0.387361	204.123	4.08028	163.706	1.25576	24.035	-0.0653096	0.155644	0.168791	112.763	36.4803	-11.5568
2019-04-28	195	11:09:32	29.3241	-81.0087	0.26257	0.134078	0.201117	23.9939	34.6403	17.2274	157.575	135.078	0.111732	0.407821	0.330667	305.629	2.86425	159.159	1.49929	23.972	-0.0653096	0.155644	0.168791	112.763	36.4803	-18.5634
2019-04-28	196	13:26:51	29.3013	-80.9951	0.119266	0	0.119266	24.0027	34.6296	14.361	157.937	138.107	0.0183486	0.688073	0.325926	302.886	3.3669	141.661	1.71405	24.011	-0.0653096	0.155644	0.168791	112.763	36.4803	-11.5568
2019-04-29	195	08:04:00	29.3291	-81.0088	0.290155	0.0569948	0.26943	24.0786	34.6425	16.5944	157.479	131.938	0.0569948	0.176166	0.260833	304.103	3.10114	164.653	1.30652	24.066	-0.0653096	0.155644	0.168791	112.763	36.4803	-18.5634
2019-04-29	196	20:04:00	29.3032	-80.9968	0.221053	0.0631579	0.2	24.1006	34.5909	15.7137	158.151	143.59	0	0.905263	0.278333	307.52	1.53432	162.03	1.44548	24.115	-0.0653096	0.155644	0.168791	112.763	36.4803	-11.5568
2019-04-30	196	09:59:00	29.295	-80.9841	0.125523	0.0209205	0.117155	24.2341	34.6194	13.4524	157.531	135.363	0	0.288703	0.397361	216.348	3.91	163.271	1.24213	24.586	-0.0653096	0.155644	0.168791	112.763	36.4803	-11.5568
